# Supplementary material
Source: Elsevier journal article supplement (https://www.sciencedirect.com/science/article/pii/S1575092214002988)
Supplement: mmc1 [file S1575092214002988:mmc1.pdf]

**Anexo 1. SISTEMA GRADE** (Grading of Recommendations, Assesment, Developement and Evaluation) de evaluación de las evidencias y recomendaciones (<http://www.gradeworkinggroup.org/>).

**Dirección:**

**A FAVOR:**

Los efectos deseados de una intervención frente a otra intervención superan los efectos indeseados.

**EN CONTRA:**

Los efectos indeseados de una intervención frente a otra intervención superan los efectos deseados

**Fuerza**

**FUERTE:**

Disponemos de una confianza alta respecto a un balance favorable de los defectos deseables frente a los indeseables de una intervención frente a otra.

**DEBIL:**

Existen dudas sobre el balance entre los efectos deseables y los indeseables de una intervención frente a otra.

**CALIDAD DE LA EVIDENCIA.**

**ALTA:**

Confianza alta en que la estimación del efecto disponible en la literatura científica se encuentra muy cercano al efecto real.

**MODERADA:**

Es probable que la estimación del efecto se encuentre cercano al efecto real, aunque podrían existir diferencias sustanciales.

**BAJA:**

La estimación del efecto puede ser sustancialmente diferente al efecto real.

**MUY BAJA:** es muy probable que la estimación del efecto sea sustancialmente diferente al efecto real.
